# Supplementary material for: Development of a neuron model based on DNAzyme regulation
Source: Royal Society of Chemistry journal article supplement (doi:10.1039/d0ra10515e), 2021-01-01
Supplement: d0ra10515e1.pdf [file d0ra10515e1.pdf]

## Supporting Information

# Development of neuron model based on DNAzyme regulation

Cong Chen<sup>1</sup>, Ranfeng Wu<sup>2</sup> and Bin Wang<sup>1,\*</sup>

<sup>1</sup> Key Laboratory of Advanced Design and Intelligent Computing, Dalian University, Ministry of Education, Dalian 116622, China; [m17862859321@163.com](mailto:m17862859321@163.com)(C.C.), [wangbinpaper@gmail.com](mailto:wangbinpaper@gmail.com)(B.W.)

<sup>2</sup> School of Computer Science and Technology, Dalian University of Technology, Dalian 116024, China;

\* Correspondence: [wangbinpaper@gmail.com](mailto:wangbinpaper@gmail.com)(B.W.)

|                                                        |    |
|--------------------------------------------------------|----|
| 1 Weight unit 2.....                                   | 2  |
| 2 Weight unit 3.....                                   | 3  |
| 3 Integration gate.....                                | 4  |
| 4 Threshold gate .....                                 | 5  |
| 5 Reporter gate.....                                   | 6  |
| 6 Reporter gate optimization .....                     | 7  |
| 7 An artificial DNA neuron model .....                 | 8  |
| 8 Optimization of weight unit and threshold gate ..... | 9  |
| 9 Voting machine.....                                  | 10 |
| 10 DNA sequences .....                                 | 11 |
| 11 References.....                                     | 12 |

## 1 Weight unit 2

In order to fully realize the function of an artificial neuron in the experimental work, we verified the feasibility of the other two weight units.

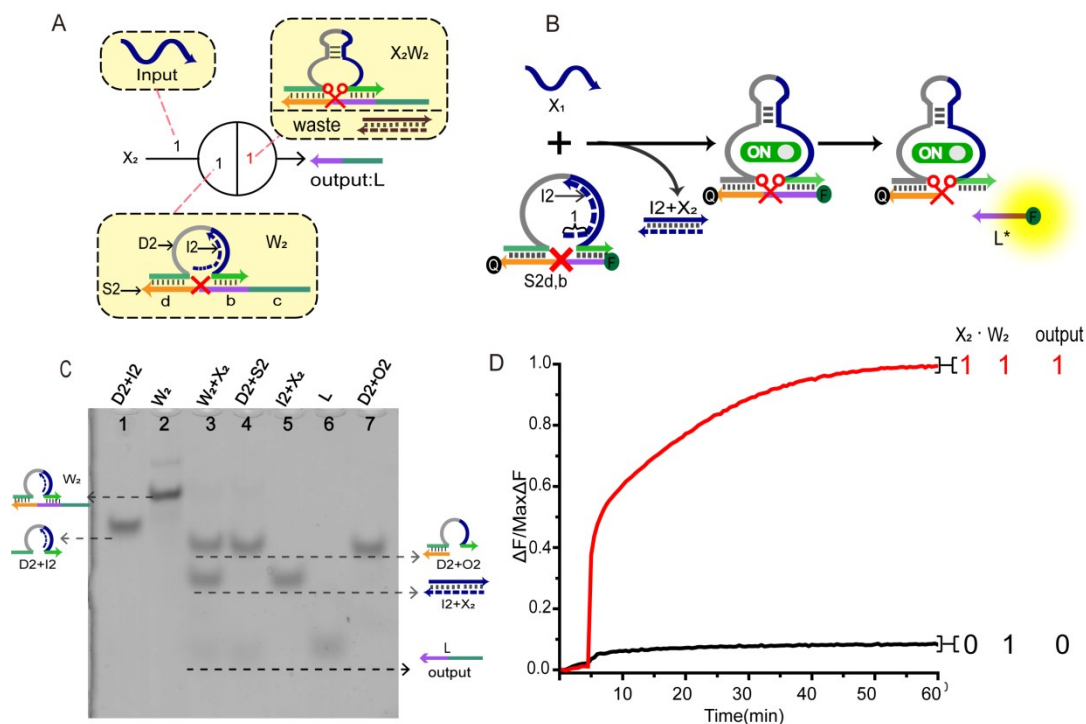

**Figure S1.** (A) Abstract diagram of the weight unit 2 motif and its DNA implementation. The black numbers indicate the initial relative concentration. Red numbers indicate relative product concentrations, and different colors indicate distinct DNA sequences.  $S_{2d}$  is the left (3'-end) recognition domain of substrate strand 2 ( $S_2$ ), while  $S_{2b}$  is the right (5'-end) recognition domain of  $S_2$ . (B) Illustration of the weight unit 2. The substrate strand sequence is  $S_{2a,b}$ , 5'-end fluorophore FAM and 3'-end quencher BHQ1 for fluorescent signal determination. (C) Native PAGE analysis of the weight unit 2. The strands and complex involved were labeled above the lane number. Lane 1, complex ( $D_2+I_2$ ) consists of DNAzyme 2 ( $D_2$ ) and inhibitor 2 ( $I_2$ ); lane 2, weight unit 2 ( $W_2$ ) consisting of  $D_2$ ,  $I_2$  and  $S_2$ ; lane 3, products of  $W_2$  triggered by input  $X_2$ ; lane 4, products of  $D_2$  digestion; lane 5, complex ( $I_2+X_2$ ); lane 6, output strand  $L$ ; Lane 7, complex ( $D_2+O_2$ ). (D) Time-dependent fluorescence changes according to different inputs. The red curve reflects the reaction with the addition of  $X_2$  and the black curve is the case with no input.

The reaction could be depicted in Figure S1 B. The cutting activity of  $D_2$  was inhibited because of the catalytic core of  $D_2$  hybridizes with the  $I_2$ , while the substrate  $S_{2d,b}$  could not be cut. The reaction could only be triggered after the addition of input signal  $X_2$ . The properties of  $W_2$  was determined by native PAGE gel electrophoresis and fluorescence assay.

Figure S1 C shows PAGE analysis of  $W_2$ . Lane 2 indicated that the initial  $W_2$  was present and stable in a single gel band. Lane 3, in the presence of input signal  $X_2$ , the  $W_2$  band disappeared to produce three new bands ( $D_2+O_2$ ), ( $I_2+X_2$ ) and  $L$ . Lane 4 was  $D_2$  cutting the  $S_2$  directly, resulting in two new bands ( $D_2+O_2$ ) and  $L$ . It was proved that  $D_2$  restored the

activation of DNAzyme after adding the input signal. The PAGE gel experiment results prove the correctness of  $W_2$ .

Fluorescence measurements was also performed to detect the performance of  $W_2$ . The red curve indicated that the input signal  $X_2$  was added, and a significant fluorescence increase can be observed. On the contrary, no remarkable increase of fluorescent signal could be observed in the black curve without the addition of input strand  $X_2$ . The results demonstrate the successful performance of  $W_2$ .

## 2 Weight unit 3

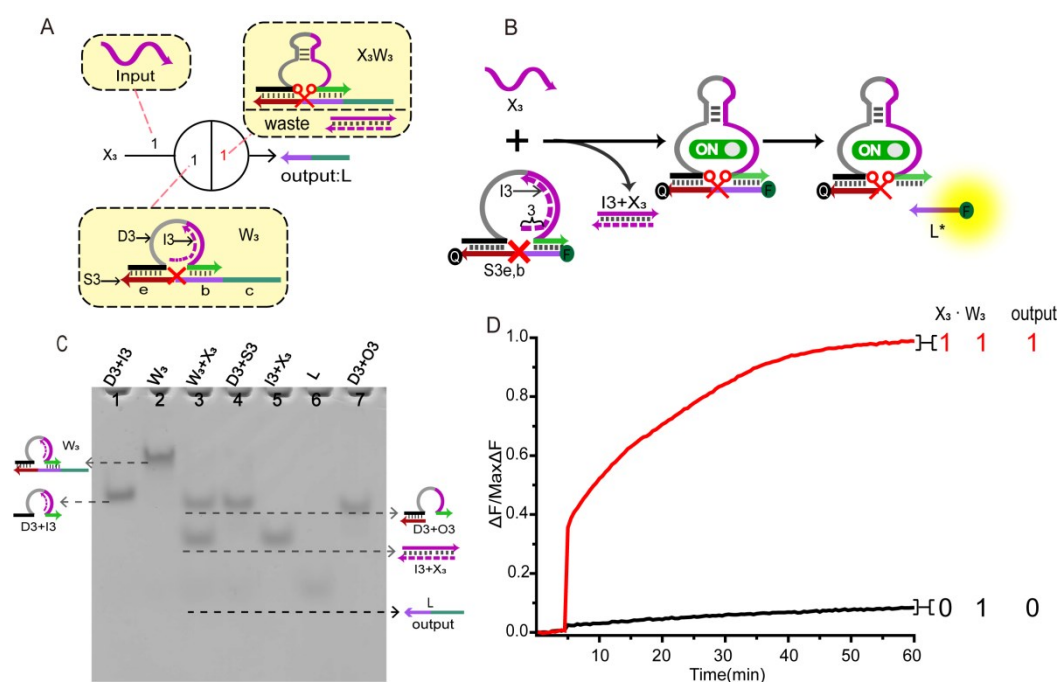

**Figure S2.** (A) Abstract diagram of the weight unit 3 motif and its DNA implementation. The black numbers indicate the initial relative concentration. Red numbers indicate relative product concentrations, and different colors indicate distinct DNA sequences.  $S3_e$  is the left (3'-end) recognition domain of substrate strand 3 ( $S3$ ), while  $S3_b$  is the right (5'-end) recognition domain of  $S3$ . (B) Illustration of the weight unit 3. The substrate strand sequence is  $S3_{e,b}$ , 5'-end fluorophore FAM and 3'-end quencher BHQ1 for fluorescent signal determination. (C) Native PAGE analysis of the weight unit 3. The strands and complex involved were labeled above the lane number. Lane 1, complex ( $D3+I3$ ) consists of DNAzyme 3 ( $D3$ ) and inhibitor 3 ( $I3$ ); lane 2, weight unit 3 ( $W_3$ ) consists of  $D3$ ,  $I3$  and  $S3$ ; lane 3, products of  $W_3$  triggered by input  $X_3$ ; lane 4, products of  $D3$  digestion; lane 5, complex ( $I3+X_3$ ); lane 6, product strand  $L$ ; Lane 7, complex ( $D3+O3$ ). (D) Time-dependent fluorescence changes according to different inputs. The red curve reflects the reaction with the addition of  $X_3$  and the black curve is the case with no input.

The reaction could be depicted in Figure S2 B. The cutting activity of  $D3$  was inhibited because of the catalytic core of  $D3$  hybridizes with the  $I3$ , while the substrate  $S3_{e,b}$  could not be cut. The reaction could only be triggered after the addition of input signal  $X_3$ . The

properties of  $W_3$  was determined by native PAGE gel electrophoresis and fluorescence assay.

Figure S2 C shows PAGE analysis of  $W_3$ . Lane 2 indicated that the initial  $W_3$  was present and stable in a single gel band. Lane 3, in the presence of input signal  $X_3$ , the  $W_3$  band disappeared to produce three new bands ( $D3+O3$ ), ( $I3+X_3$ ) and L. Lane 4 was D3 cutting the S3 directly, resulting in two new bands ( $D3+O3$ ) and L. It was proved that D3 restored the activation of DNAzyme after adding the input signal. The PAGE gel experiment results prove the correctness of  $W_3$ .

A fluorescence measurement was also performed to detect the performance of  $W_3$ . The red curve indicated that the input signal  $X_3$  was added, and a significant fluorescence increase can be observed. On the contrary, no remarkable increase of fluorescent signal could be observed in the black curve without the addition of input strand  $X_3$ . The results demonstrate the successful performance of  $W_3$ .

### 3 Integration gate

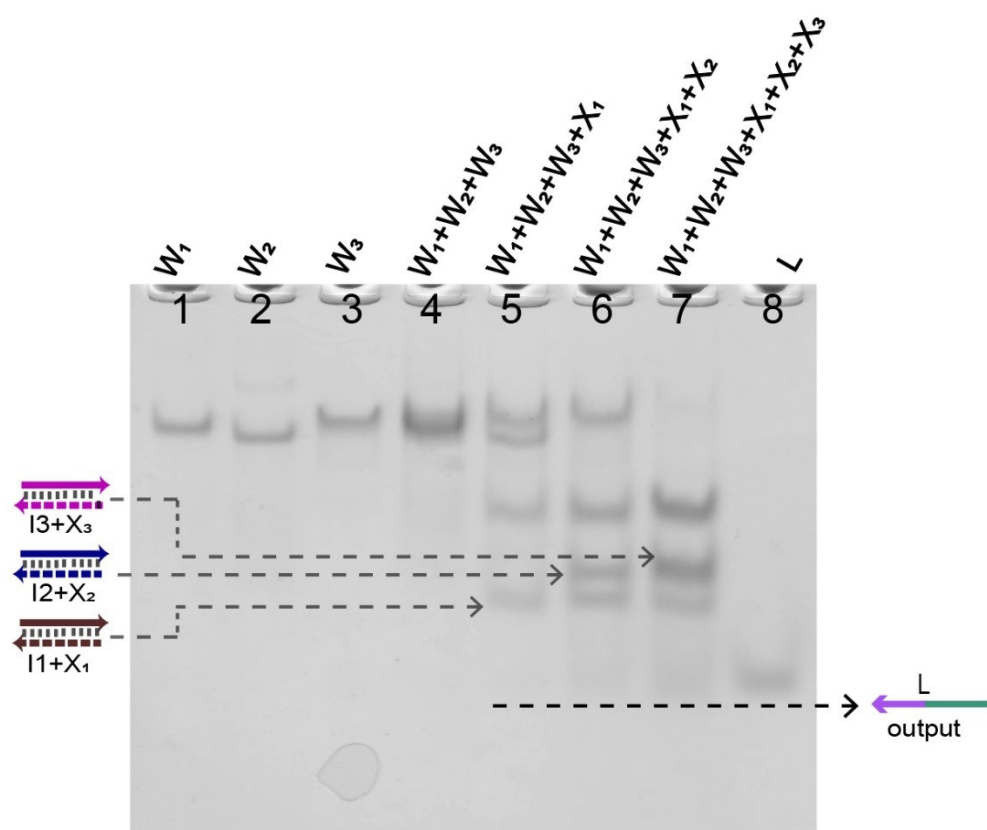

**Figure S3.** Native PAGE analysis of the integration gate. The strands and complex involved were labeled above the lane number. Lane 1, weighted unit 1 ( $W_1$ ); lane 2, weighted unit 2 ( $W_2$ ); lane 3, weighted unit 3 ( $W_3$ ); Lane 4, weighted unit mixture ( $W_1+W_2+W_3$ ); lane 5,  $X_1$  was added to the weight unit mixture; lane 6,  $X_1$  and  $X_2$  were added to the weight unit mixture; lane 7, all signals were added to the weight unit mixture; lane 8, normalized product strand L.

In order to reflect the summation function of neurons in detail, we verify the logic function of the integration gate by adding different inputs. As shown in Figure S3, Lane 1 indicated that the initial  $W_1$  was present and stable in a single gel band; Lane 2 indicated that

the initial  $W_2$  was present and stable in a single gel band; Lane 3 indicated that the initial  $W_3$  was present and stable in a single gel band. From lane 4 to lane 7, the added input signals were 0,  $X_1$ ,  $X_1+X_2$ ,  $X_1+X_2+X_3$ . It can be observed that  $W_1$  band disappeared in lane 5, and a new gel band L was generated at the bottom. In lane 6, the  $W_1$  and  $W_2$  disappeared, and a new band strand L more obvious than lane 5 was observed. In lane 7, the  $W_1$ ,  $W_2$  and  $W_3$  bands all disappeared, resulting in the darkest color of the band L. This was because with the number of input signals increased, the more strand displacement reaction occurred, making the DNAzyme exert its ability to cut the substrate strand.

#### 4 Threshold gate

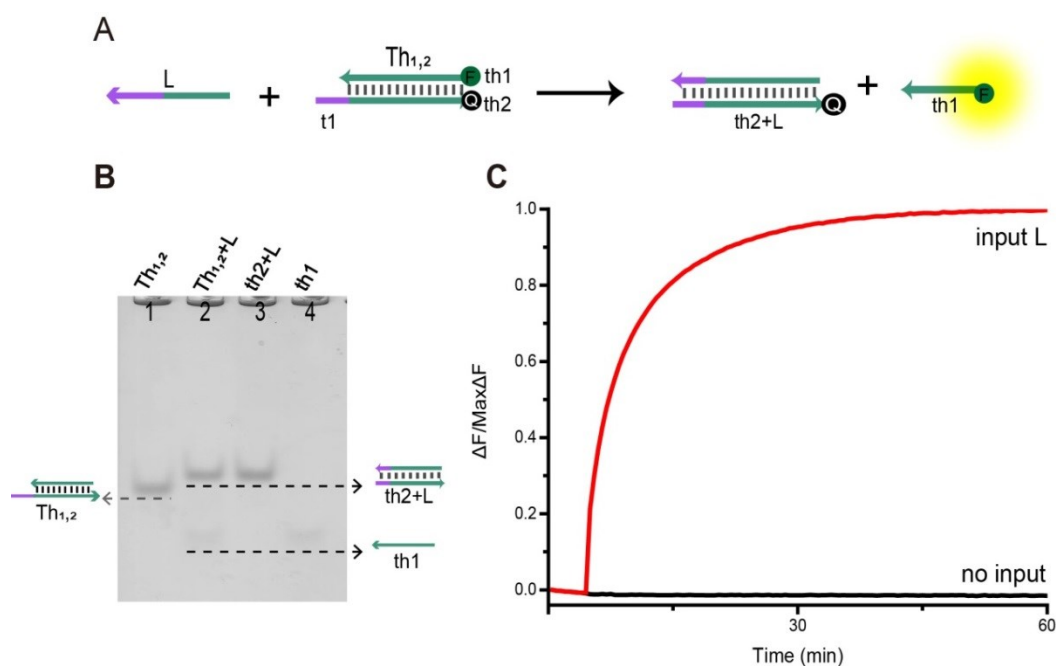

**Figure S4.** (A) Illustration of the Threshold gate. The top complementary strand th1 was labeled with the fluorophore FAM at the 5'-end and the bottom base strand th2 was labeled with the quencher BHQ1 at the 3'-end for fluorescent signal determination. (B) Native PAGE analysis of the Threshold gate. The strands and complex involved were labeled above the lane number. Lane 1, the  $Th_{1,2}(th_1+th_2)$  in the Threshold gate; Lane 2, products of Threshold gate triggered by input L ( $[Th_{1,2}]:[L]=1:1$ ); Lane 3, the product ( $th_2+L$ ); Lane 4, the product th1. (C) The fluorescence of the Threshold gate. The red curve reflects the reaction with the addition of L and the black curve is the case with no input.

Figure S4 A describes the reaction process of the Threshold gate. The input signal strand L performed strand displacement reaction through the t1 to generate a stable double-stranded complex. Native PAGE analysis of the Threshold gate as shown in Figure S4 B. Lane 1 was the location of the  $Th_{1,2}$  in the Threshold gate. When adding input signal strand L in lane 2, the band  $Th_{1,2}$  disappear to produce two new gel bands ( $th_2+L$ ) and th1. A fluorescence assay was also performed to detect the performance of the Threshold gate (Figure S4 C). The red curve indicated that the input signal L was added and a significant fluorescence increase can be observed. On the contrary, no remarkable increase of

fluorescence signal could be observed in black curve without the addition of input strand L.

## 5 Reporter gate

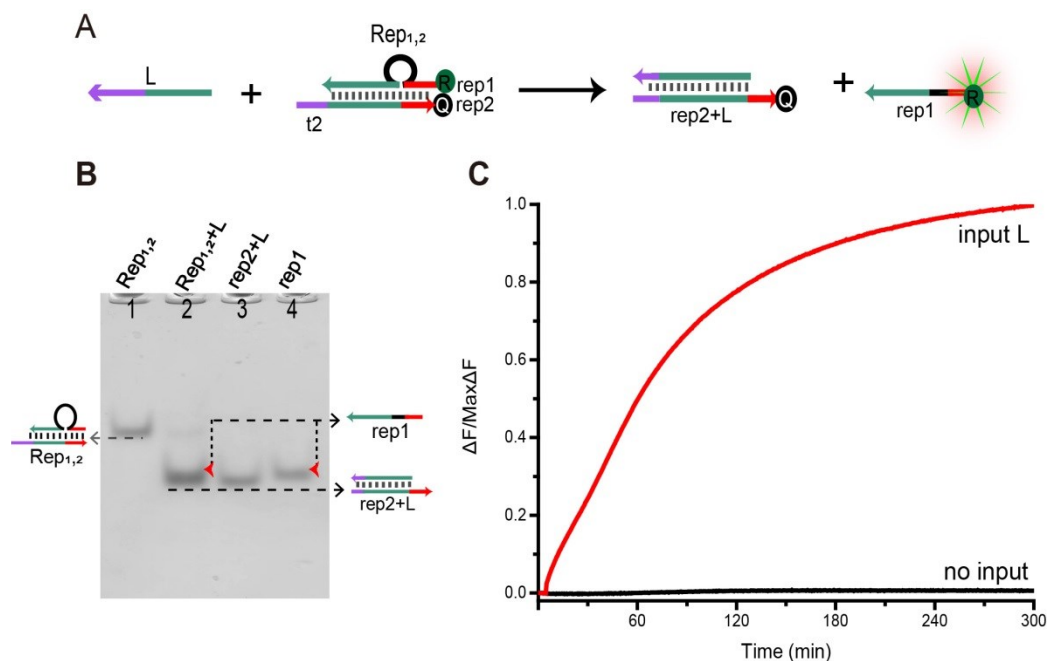

**Figure S5.** (A) Illustration of the Reporter gate. The strand rep<sub>2</sub> 3'-end marked quencher BHQ2, strand rep<sub>1</sub> 5'-end marked fluorophore ROX for fluorescence signal determination. (B) Native PAGE analysis of the Reporter gate. The strands and complex involved were labeled above the lane number. Lane 1, the Rep<sub>1,2</sub>(rep<sub>1</sub>+rep<sub>2</sub>) in the Reporter gate; Lane 2, products of Reporter gate triggered by input L([Rep<sub>1,2</sub>]:[L]=1:1); Lane 3, the product (rep<sub>2</sub>+L); Lane 4, the product rep<sub>1</sub>. (C) The fluorescence of the Reporter gate. The red curve reflects the reaction with the addition of L and black curve is the case with no input.

Figure S5 A describes the reaction process of the Reporter gate. The input signal strand L performed strand displacement reaction through the t<sub>2</sub> to generate a double-stranded complex. Native PAGE analysis of the Reporter gate as shown in Figure S5 B. Lane 1 was the location of the Rep<sub>1,2</sub> in the Reporter gate. When adding input signal strand L in lane 2, the band Rep<sub>1,2</sub> disappear to produce two new gel bands (rep<sub>2</sub>+L) and rep<sub>1</sub>. Fluorescence measurements were also performed to detect the performance of the Reporter gate (Figure S5 C). The red curve indicated that the input signal L was added and a significant fluorescence increase can be observed. No input signal was added to the black curve, so no remarkable increase of fluorescence signal could be observed.

## 6 Reporter gate optimization

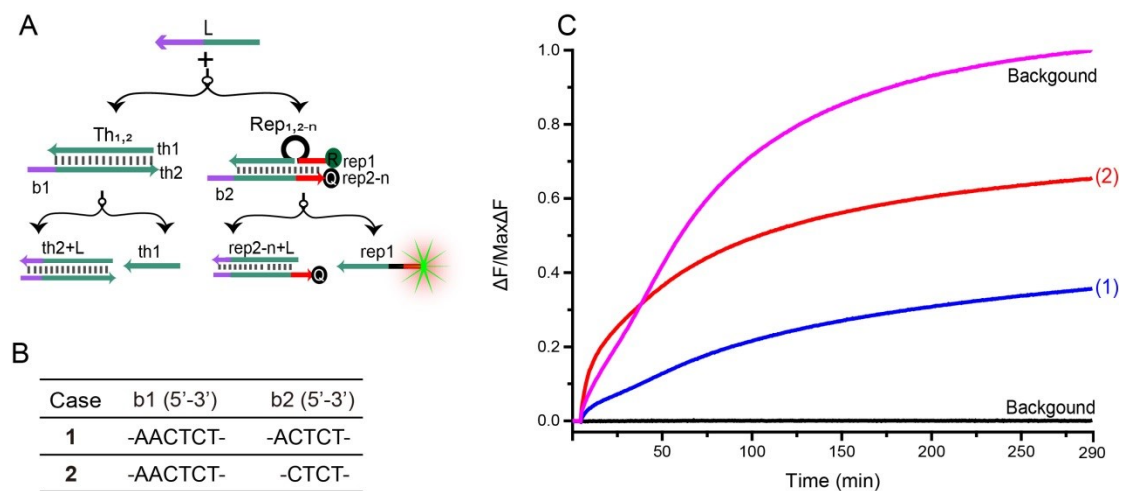

**Figure S6.** (A) Illustration of the Thresholding gate. The  $Rep_{1,2}$  consists of a base strand  $rep2$  and a top strand  $rep1$ . At the top of the strand  $rep1$  5'-end labeled fluorophore ROX, base strand  $rep2$  3'-end labeled quencher BHQ2 for fluorescence signal determination,  $rep2-n$  ( $n=1,2$ ) represents the sequence in figure S6 B( $rep2$  has the same sequence as  $rep2-2$ ). (B) The base sequence table of the toehold domain of the Threshold gate and the Reporter gate. (C) The fluorescence of the Reporter gate optimization. The ratio of  $[Th_{1,2}]$ ,  $[Rep_{1,2-n}]$  and  $[L]$  was 1:1:1. ( $[Th_{1,2}]:[Rep_{1,2-n}]:[L]=1:1:1$ ). The lowest background signal when the Report gate was completely quenched(black curve).The maximum fluorescence achieved by the complete reaction of the Reporter gate indicated the highest background signal(pink curve). The optimal number of toehold domain was selected by comparing with the background signal. Curve (1) represent the toehold sequence in Case 1, and curve (2) represent the toehold sequence in Case 2.

In order to obtain the optimal thresholding processing performance, the input signal strand  $L$  should react with the Threshold gate first. In the case that the Threshold gate toehold domain has 6 bases, we adjust the number of bases in the toehold domain of the Reporter gate to ensure that  $L$  takes precedence with the Threshold gate reaction. The strategy of reducing leakage by reducing the number of bases in the toehold domain of the Reporter gate was feasible, but considering the rate of biochemical reaction, we set  $b2$  to have at least 4 bases. Equal proportions of  $[Th_{1,2}]$ ,  $[Rep_{1,2-n}]$  and  $[L]$  were added to the solution to observe their fluorescence changes. As shown in Figure S6 C, Curve (2) indicated the leakage situation of  $b2$  has 5 bases; Curve (1) indicated the leakage situation of  $b1$  has 4 bases. It can be observed that the optimal thresholding processing performance can be obtained when the  $b1$  has 6 bases and  $b2$  has 4 bases.



## 7 An artificial DNA neuron model

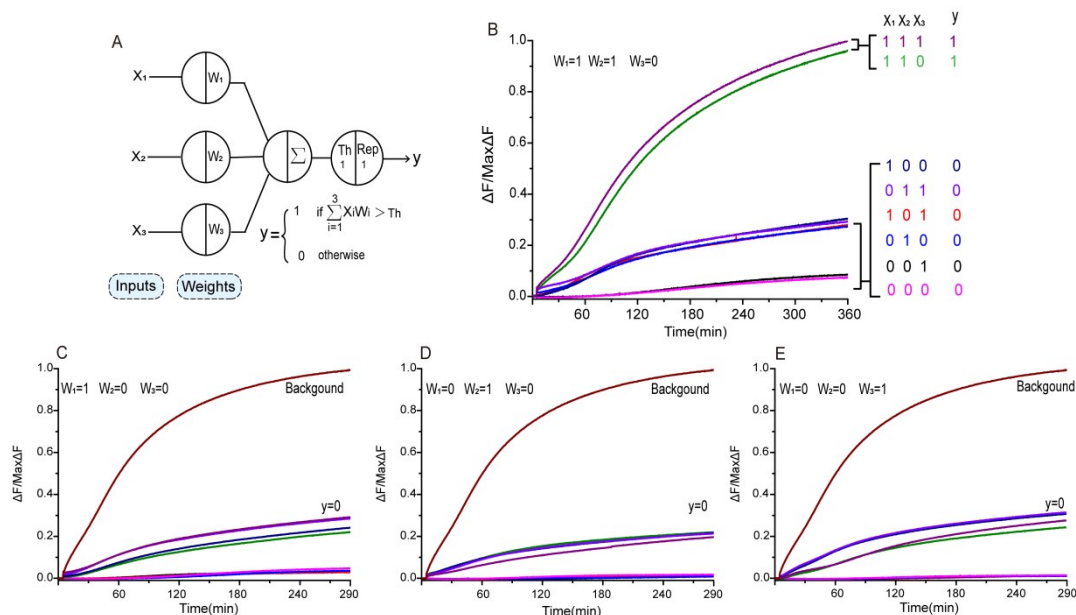

**Figure S7. (A)** Demonstration of a 3-input 1-output linear threshold gate. Each value was

represented by a relative concentration. It calculates the sum of the 3-input ( $\sum_{i=1}^3 X_i \cdot W_i$ ).

**(B)** Fluorescence detection with  $W_1=1, W_2=1, W_3=0$ . **(C)** Fluorescence detection with  $W_1=1, W_2=0, W_3=0$ . The maximum fluorescence achieved by the complete reaction of the Reporter gate indicated the highest background signal (the top curve). **(D)** Fluorescence detection with  $W_1=0, W_2=1, W_3=0$ . The maximum fluorescence achieved by the complete reaction of the Reporter gate indicated the highest background signal (the top curve). **(E)** Fluorescence detection with  $W_1=0, W_2=0, W_3=1$ . The maximum fluorescence achieved by the complete reaction of the Reporter gate indicated the highest background signal (the top curve). In fluorescence measurements the standard concentration was  $1 \times = 0.2 \mu M$ . Input strands  $X_1, X_2$  and  $X_3$  were then added with relative concentrations of  $0 \times$  or  $1 \times$ .

The output values were inferred by fluorescence signals normalized to the maximum completion level. When weight  $W_1 = 1, W_2 = 1$  and  $W_3 = 0$ , the output results were shown in Figure S7 B; When weight  $W_1 = 1, W_2 = 0$  and  $W_3 = 0$ , the output results were shown in Figure S7 C; When weight  $W_1 = 0, W_2 = 1$  and  $W_3 = 0$ , the output results were shown in Figure S7 D; When weight  $W_1 = 0, W_2 = 0$  and  $W_3 = 1$ , the output results were shown in Figure S7 E. Both weight conditions achieved the correct ON or OFF state with the complete 8 sets of inputs.



## 8 Optimization of weight unit and threshold gate

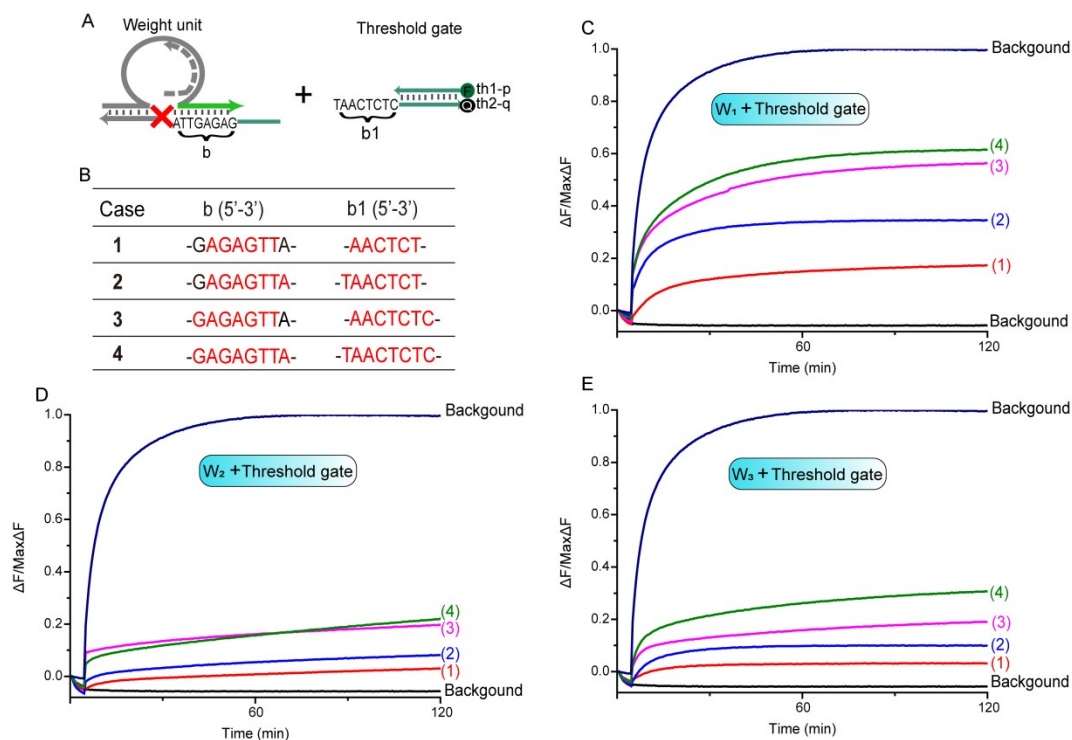

**Figure S8.** (A) Illustration of the weight unit and Threshold gate leakage. The  $Th_{1-p,2-q}$  in the Threshold gate consists of a base strand  $th2-q$  ( $q=1,2$ ) and a top strand  $th1-p$  ( $p=1,2$ ). At the top of the strand 5'-end labeled fluorophore FAM, base strand 3'-end labeled quencher BHQ1 for fluorescence signal determination ( $th1-1$  has the same sequence as  $th1$ ,  $th2-1$  has the same sequence as  $th2$ ). (B) The base sequence table of the toehold domain of the weight unit and the Threshold gate. (C) The fluorescence of the weight unit 1 and the Threshold gate. (D) The fluorescence of the weight unit 2 and the Threshold gate. (E) The fluorescence of the weight unit 3 and the Threshold gate. The lowest background signal indicated the Threshold gate was completely quenched (black curve). The maximum fluorescence achieved by the complete reaction of the Threshold gate indicated the highest background signal (the top curve). The optimal number of toehold domain in Threshold gate was selected by comparing with the background signal.

In order to obtain the optimal performance of the neuron model, we optimized the Threshold gate. Leakage was unavoidable in the molecular system, so we reduce the system leakage by adjusting the position of the complementary base sequence of the Threshold gate in the weight unit. The domain of  $b$  where the normalized product  $L$  can be used to trigger the downstream reaction has 8 bases. Due to the insufficient binding ability of the DNzyme binding arm to the substrate, we suspect that there was a certain leakage between the weight unit and the Threshold gate. By adjusting the sequence of  $b1$ , the leakage in the experiment was optimized, and the results were verified by fluorescence experiments. The leakage reaction between weight unit 1 and Threshold gates with different toehold as shown in Figure S8 C. Curves (1) - (4) correspond to Case 1-4 in Figure S8 B. The fluorescence results of weight unit 2 and weight unit 3 were shown in Figure S8 D and S8 E respectively. Curve

labels correspond to the b1 sequence in Figure S8 B. By fluorescence detection results, it can be observed that curve (1) in each fluorescence figure has the least fluorescence growth, so we used the base sequence shown in Case 1 as the toehold domain of the Threshold gate.

## 9 Voting machine

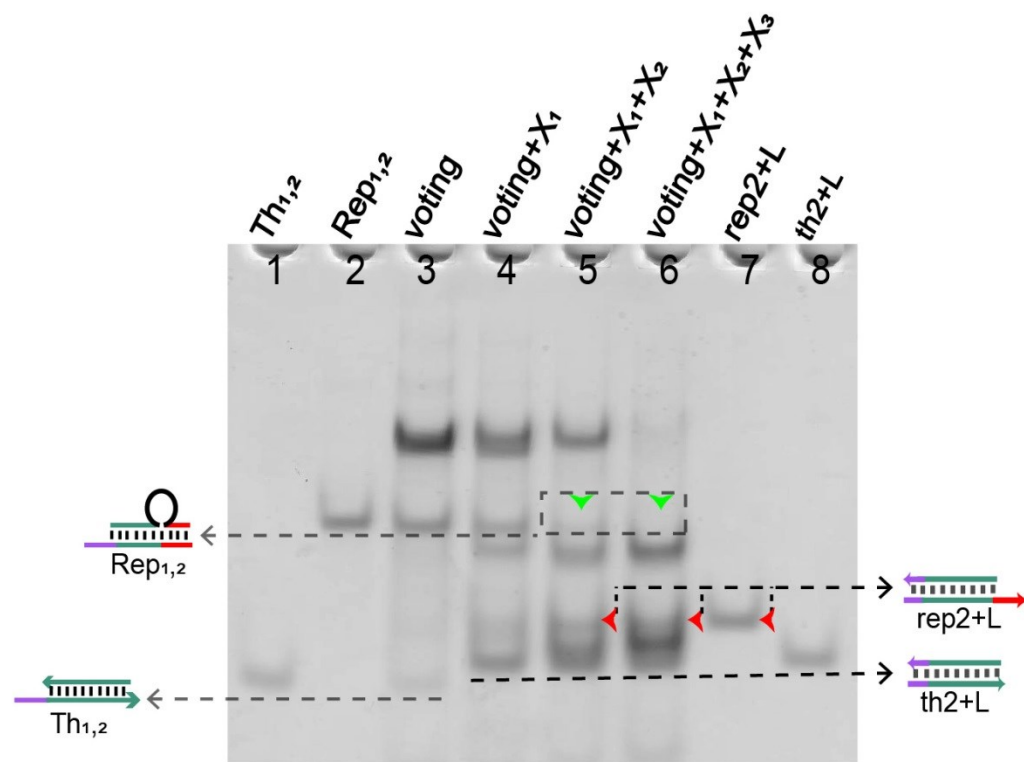

**Figure S9.** Native PAGE analysis of the voting circuit. The strands and complex involved were labeled above the lane number. The voting system consisted of  $[W_1]$ ,  $[W_2]$ ,  $[W_3]$ ,  $[Th_{1,2}]$ ,  $[Rep_{1,2}]$ , and their proportion of 1:1:1:1:1. Different inputs were added to validate the voting result. Lane 1, the  $Th_{1,2}(th1+th2)$ ; Lane 2, the  $Rep_{1,2}(rep1+rep2)$ ; lane 3, the components required for voting system; lane 4, the signal  $X_1$  was added to the voting system; lane 5, the signal  $X_1$  and  $X_2$  were added to the voting system; lane 6, all input signals  $X_1$ ,  $X_2$  and  $X_3$  were added to the voting system; lane 7, the product of the Reporter gate(*rep2+L*); lane 8, the product of the Threshold gate(*th2+L*).

As shown in Figure S9, lane 3 was the voting system in the initial state, and the two bands  $Rep_{1,2}$  and  $Th_{1,2}$  can be clearly observed. Lane 4 was added an input signal  $X_1$ , which by rule was invalid if only one voter "agree", so the band  $Rep_{1,2}$  still existed in lane 4. The input signals  $X_1+X_2$ ,  $X_1+X_2+X_3$  were also added to lanes 5 to 6 respectively. In these two lanes, the gel band  $Rep_{1,2}$  disappeared (the green arrow shows the position) and a new band (*rep2+L*) was generated (the red arrow shows the position).

## 10 DNA sequences

| Name   | Sequences (from 5'to 3')                                      | Length (n.t.) |
|--------|---------------------------------------------------------------|---------------|
| D1     | GAGCGATCTAGCAGCGATATCACGCCTCGTCTGGCGTGATCACCC<br>ATGTTAACTCTC | 57            |
| I1     | AATCGATCATGGGTGATCACGCCA                                      | 24            |
| S1     | TTGACGAGTCCACCAGAGAGTTAT/rA/GGCTAGATCGCTC                     | 39            |
| X1     | AGGCGTGATCACCCATGATCGATT                                      | 24            |
| O1     | GGCTAGATCGCTC                                                 | 13            |
| S1a,b  | GAGAGTTAT/rA/GGCTAGATCGCTC                                    | 24            |
| D2     | TAGTGTATGTT CAGCGATGACTCGTCTTGTTGACGAGTCCACCCAT<br>GTTAACTCTC | 56            |
| I2     | AGATATTCATGGGTGGACTCGTCAA                                     | 25            |
| S2     | TTGACGAGTCCACCAGAGAGTTAT/rA/GGAACATACACTA                     | 39            |
| X2     | TTGACGAGTCCACCCATGAATATCT                                     | 25            |
| O2     | GGAACATACACTA                                                 | 13            |
| S2d,b  | GAGAGTTAT/rA/GGAACATACACTA                                    | 24            |
| D3     | TGTCATTCGTT CAGCGATCTCAGGTGTGTATCACCTGAGCACCCAT<br>GTTAACTCTC | 56            |
| I3     | CATATCTCATGGGTGCTCAGGTGATA                                    | 26            |
| S3     | TTGACGAGTCCACCAGAGAGTTAT/rA/GGAACGAATGACA                     | 39            |
| X3     | GTATCACCTGAGCACCCATGAGATATG                                   | 27            |
| O3     | GGAACGAATGACA                                                 | 13            |
| S3e,b  | GAGAGTTAT/rA/GGAACGAATGACA                                    | 24            |
| L      | TTGACGAGTCCACCAGAGAGTTATA                                     | 25            |
| L*     | GAGAGTTAT/rA/                                                 | 10            |
| th1    | CTTGACGAGTCCACCAG                                             | 17            |
| th1-2  | CTTGACGAGTCCACCA                                              | 16            |
| th2    | AACTCTCTGGTGGACTCGTCAAG                                       | 23            |
| th2-2  | TA ACTCTCTGGTGGACTCGTCAAG                                     | 24            |
| rep1   | TAGAGATTGTACCCACGGCAAGGCCTAGCGACTGACGAGTCCACC<br>AG           | 47            |
| rep2   | CTCTCTGGTGGACTCGTCAATCTCTATTTTT                               | 31            |
| rep2-1 | ACTCTCTGGTGGACTCGTCAATCTCTATTTTT                              | 32            |

**Table S1. DNA sequences**

All of the sequences used in this work were designed using Nupack<sup>1-3</sup>.

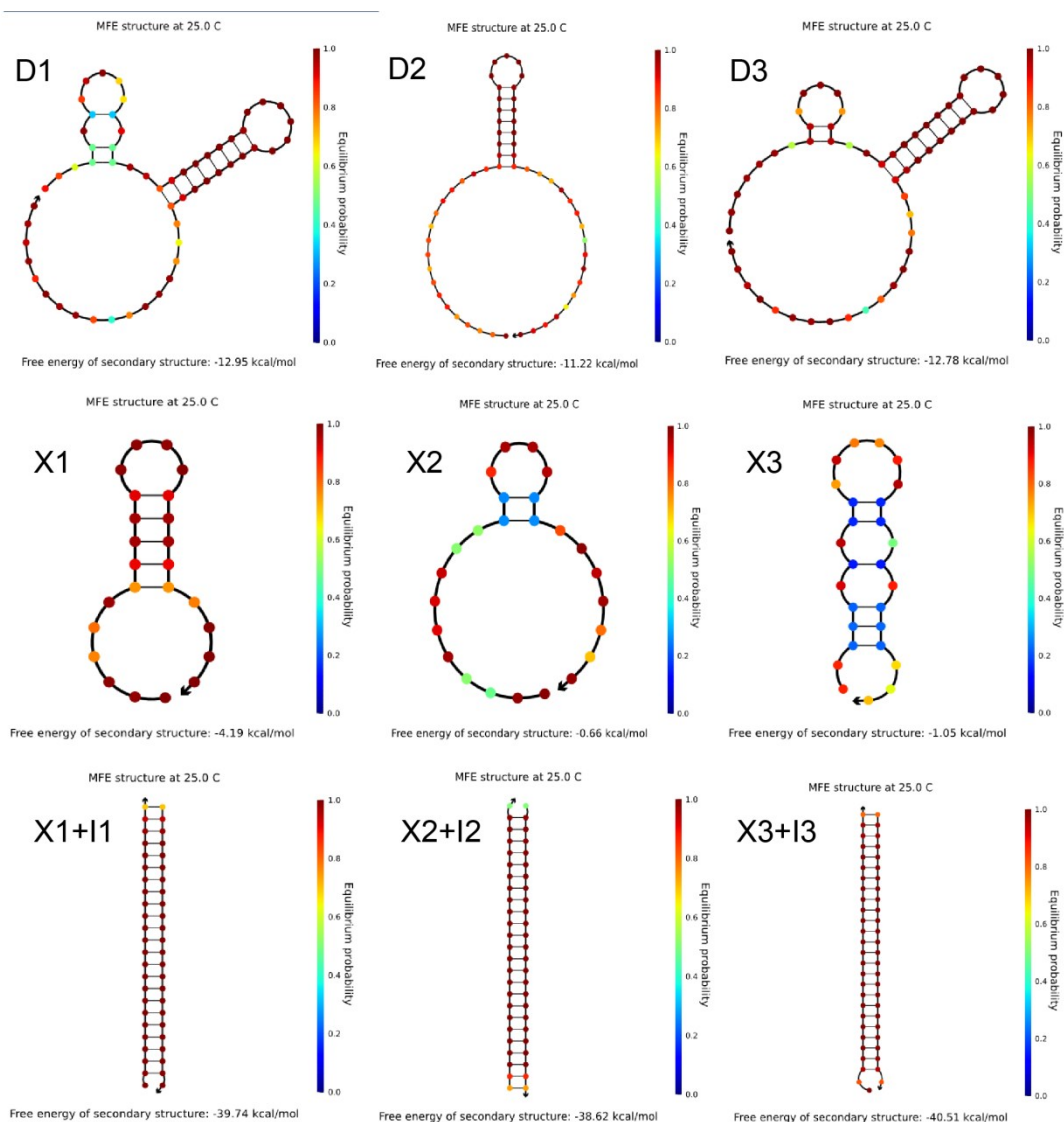

Figure S10. Nupack simulations for partial DNA sequences in table S1.

## 11 References

- 1 B. R. Wolfe, N. J. Porubsky, J. N. Zadeh, R. M. Dirks and N. A. Pierce, *J. Am. Chem. Soc.*, 2017, **139**, 3134–3144.
- 2 J. N. Zadeh, C. D. Steenberg, J. S. Bois, B. R. Wolfe, M. B. Pierce, A. R. Khan, R. M. Dirks and N. A. Pierce, *J. Comput. Chem.*, 2011, **32**, 170–173.
- 3 B. R. Wolfe and N. A. Pierce, *ACS Synth. Biol.*, 2015, **4**, 1086–1100.
